# Supplementary material for: Synthesis and luminescence studies of lanthanide complexes (Gd, Tb, Dy) with phenyl- and 2-pyridylthiolates supported by a bulky β-diketiminate ligand. Impact of the ligand environment on terbium(iii) emission
Source: Royal Society of Chemistry journal article supplement (doi:10.1039/d0nj04201c), 2020-01-01
Supplement: d0nj04201c1.pdf [file d0nj04201c1.pdf]

## New Journal of Chemistry

### Supporting information

#### **Synthesis and luminescence studies of lanthanide complexes (Gd, Dy, Tb) with phenyl- and 2-pyridylthiolates supported by bulky $\beta$ -diketiminato ligand. Impact of ligand environment on terbium(III) emission**

Olga A. Mironova, Aleksey A. Ryadun, Taisiya S. Sukhikh, Sergey N. Konchenko, Nikolay A. Pushkarevsky\*

Nikolaev Institute of Inorganic Chemistry SB RAS, Akademika Lavrentieva Ave. 3, 630090  
Novosibirsk, Russia

#### Table of contents:

1. X-ray structural determination
2. Electronic spectra
3. Luminescent study

# 1. X-ray structural determination

**Table S1.** Crystallographic data for the compounds.

| Compound                                              | <b>1<sup>Gd</sup>·thf</b>                                                      | <b>1<sup>Tb</sup></b>                                                           | <b>1<sup>Tb</sup>(super)</b>                                                    | <b>1<sup>Dy</sup>·0.5thf</b>                                                     | <b>2<sup>Tb</sup></b>                                               | <b>2<sup>Dy</sup></b>                                                                       | <b>4<sup>Tb</sup>·2C<sub>7</sub>H<sub>8</sub></b>                              | <b>3<sup>Dy</sup>·0.34thf</b>                                                           |
|-------------------------------------------------------|--------------------------------------------------------------------------------|---------------------------------------------------------------------------------|---------------------------------------------------------------------------------|----------------------------------------------------------------------------------|---------------------------------------------------------------------|---------------------------------------------------------------------------------------------|--------------------------------------------------------------------------------|-----------------------------------------------------------------------------------------|
| Empirical formula                                     | C <sub>41</sub> H <sub>65</sub> GdI <sub>2</sub> N <sub>2</sub> O <sub>3</sub> | C <sub>37</sub> H <sub>57</sub> I <sub>2</sub> N <sub>2</sub> O <sub>2</sub> Tb | C <sub>37</sub> H <sub>57</sub> I <sub>2</sub> N <sub>2</sub> O <sub>2</sub> Tb | C <sub>35</sub> H <sub>53</sub> DyI <sub>2</sub> N <sub>2</sub> O <sub>1.5</sub> | C <sub>45</sub> H <sub>59</sub> N <sub>2</sub> OS <sub>2</sub> Tb   | C <sub>44.84</sub> H <sub>58.87</sub> DyI <sub>0.03</sub> N <sub>2</sub> OS <sub>1.98</sub> | C <sub>96</sub> H <sub>118</sub> N <sub>4</sub> S <sub>4</sub> Tb <sub>2</sub> | C <sub>40.38</sub> H <sub>51.76</sub> DyN <sub>4</sub> O <sub>0.34</sub> S <sub>2</sub> |
| Formula weight                                        | 1045.00                                                                        | 974.56                                                                          | 974.56                                                                          | 942.09                                                                           | 866.98                                                              | 870.94                                                                                      | 1774.02                                                                        | 825.28                                                                                  |
| Temperature/K                                         | 150(2)                                                                         | 150(2)                                                                          | 150(2)                                                                          | 150(2)                                                                           | 150(2)                                                              | 150(2)                                                                                      | 150(2)                                                                         | 150(2)                                                                                  |
| Space group                                           | <i>P</i> 2 <sub>1</sub> / <i>m</i>                                             | <i>P</i> -1                                                                     | <i>P</i> -1                                                                     | <i>C</i> 2/ <i>c</i>                                                             | <i>P</i> -1                                                         | <i>P</i> -1                                                                                 | <i>P</i> -1                                                                    | <i>P</i> 2 <sub>1</sub> / <i>n</i>                                                      |
| <i>a</i> /Å                                           | 10.2426(4)                                                                     | 12.7128(5)                                                                      | 19.1978(6)                                                                      | 31.9845(6)                                                                       | 11.1634(4)                                                          | 11.1737(3)                                                                                  | 11.4580(6)                                                                     | 12.8956(5)                                                                              |
| <i>b</i> /Å                                           | 20.0490(9)                                                                     | 19.5799(6)                                                                      | 19.5799(6)                                                                      | 12.1125(3)                                                                       | 11.3600(5)                                                          | 11.3349(4)                                                                                  | 14.6416(7)                                                                     | 19.6998(7)                                                                              |
| <i>c</i> /Å                                           | 10.6372(7)                                                                     | 16.8372(5)                                                                      | 22.8398(8)                                                                      | 21.4148(5)                                                                       | 18.3231(9)                                                          | 18.2940(5)                                                                                  | 15.2678(6)                                                                     | 15.2240(7)                                                                              |
| $\alpha$ /°                                           | 90                                                                             | 94.1500(10)                                                                     | 102.7210(10)                                                                    | 90                                                                               | 88.633(2)                                                           | 88.5000(10)                                                                                 | 92.345(2)                                                                      | 90                                                                                      |
| $\beta$ /°                                            | 92.955(2)                                                                      | 79.6990(10)                                                                     | 106.1380(10)                                                                    | 116.2470(10)                                                                     | 81.303(2)                                                           | 81.1760(10)                                                                                 | 111.744(2)                                                                     | 93.257(2)                                                                               |
| $\gamma$ /°                                           | 90                                                                             | 107.4440(10)                                                                    | 97.7610(10)                                                                     | 90                                                                               | 65.0100(10)                                                         | 65.0310(10)                                                                                 | 111.629(2)                                                                     | 90                                                                                      |
| Volume/Å <sup>3</sup>                                 | 2181.49(19)                                                                    | 3933.1(2)                                                                       | 7866.1(4)                                                                       | 7441.0(3)                                                                        | 2079.83(16)                                                         | 2073.65(11)                                                                                 | 2164.40(18)                                                                    | 3861.3(3)                                                                               |
| Z                                                     | 2                                                                              | 4                                                                               | 8                                                                               | 8                                                                                | 2                                                                   | 2                                                                                           | 1                                                                              | 4                                                                                       |
| $\rho_{\text{calc}}/\text{cm}^3$                      | 1.591                                                                          | 1.646                                                                           | 1.646                                                                           | 1.682                                                                            | 1.384                                                               | 1.395                                                                                       | 1.361                                                                          | 1.420                                                                                   |
| $\mu/\text{mm}^{-1}$                                  | 2.971                                                                          | 3.399                                                                           | 3.399                                                                           | 3.697                                                                            | 1.836                                                               | 1.955                                                                                       | 1.764                                                                          | 2.077                                                                                   |
| F(000)                                                | 1038.0                                                                         | 1920.0                                                                          | 3840.0                                                                          | 3688.0                                                                           | 896.0                                                               | 898.0                                                                                       | 916.0                                                                          | 1691.0                                                                                  |
| Radiation                                             | MoK $\alpha$ ( $\lambda = 0.71073$ )                                           | MoK $\alpha$ ( $\lambda = 0.71073$ )                                            | MoK $\alpha$ ( $\lambda = 0.71073$ )                                            | MoK $\alpha$ ( $\lambda = 0.71073$ )                                             | MoK $\alpha$ ( $\lambda = 0.71073$ )                                | MoK $\alpha$ ( $\lambda = 0.71073$ )                                                        | MoK $\alpha$ ( $\lambda = 0.71073$ )                                           | MoK $\alpha$ ( $\lambda = 0.71073$ )                                                    |
| 2 $\theta$ range for data collection/°                | 3.982 to 49.228                                                                | 3.254 to 52.896                                                                 | 1.928 to 52.9                                                                   | 3.894 to 52.954                                                                  | 4.076 to 52.962                                                     | 4.072 to 55.888                                                                             | 4.004 to 55.83                                                                 | 3.384 to 51.456                                                                         |
| Index ranges                                          | -10 ≤ <i>h</i> ≤ 12,<br>-22 ≤ <i>k</i> ≤ 19,<br>-11 ≤ <i>l</i> ≤ 5             | -15 ≤ <i>h</i> ≤ 15,<br>-22 ≤ <i>k</i> ≤ 24,<br>-21 ≤ <i>l</i> ≤ 16             | -24 ≤ <i>h</i> ≤ 24,<br>-23 ≤ <i>k</i> ≤ 24,<br>-28 ≤ <i>l</i> ≤ 27             | -40 ≤ <i>h</i> ≤ 33,<br>-15 ≤ <i>k</i> ≤ 11,<br>-23 ≤ <i>l</i> ≤ 26              | -12 ≤ <i>h</i> ≤ 13,<br>-13 ≤ <i>k</i> ≤ 14,<br>-22 ≤ <i>l</i> ≤ 22 | -14 ≤ <i>h</i> ≤ 14,<br>-14 ≤ <i>k</i> ≤ 14,<br>-24 ≤ <i>l</i> ≤ 21                         | -15 ≤ <i>h</i> ≤ 15, -19 ≤ <i>k</i> ≤ 19, -20 ≤ <i>l</i> ≤ 13                  | -15 ≤ <i>h</i> ≤ 15,<br>-22 ≤ <i>k</i> ≤ 24,<br>-18 ≤ <i>l</i> ≤ 14                     |
| Reflections collected                                 | 5152                                                                           | 35394                                                                           | 71164                                                                           | 24646                                                                            | 16619                                                               | 17676                                                                                       | 36467                                                                          | 29367                                                                                   |
| Independent reflections                               | 2613 [R <sub>int</sub> = 0.0195, R <sub>sigma</sub> = 0.0293]                  | 16094 [R <sub>int</sub> = 0.0258, R <sub>sigma</sub> = 0.0435]                  | 32268 [R <sub>int</sub> = 0.0329, R <sub>sigma</sub> = 0.0607]                  | 7616 [R <sub>int</sub> = 0.0317, R <sub>sigma</sub> = 0.0389]                    | 8512 [R <sub>int</sub> = 0.0237, R <sub>sigma</sub> = 0.0412]       | 9547 [R <sub>int</sub> = 0.0176, R <sub>sigma</sub> = 0.0286]                               | 10281 [R <sub>int</sub> = 0.0315, R <sub>sigma</sub> = 0.0306]                 | 7362 [R <sub>int</sub> = 0.0301, R <sub>sigma</sub> = 0.0325]                           |
| Restraints/parameters                                 | 27/238                                                                         | 90/860                                                                          | 118/1663                                                                        | 21/385                                                                           | 7/479                                                               | 7/484                                                                                       | 384/675                                                                        | 6/446                                                                                   |
| Goodness-of-fit on F <sup>2</sup>                     | 1.035                                                                          | 1.021                                                                           | 1.015                                                                           | 1.032                                                                            | 1.047                                                               | 1.045                                                                                       | 1.046                                                                          | 1.021                                                                                   |
| Final R indexes [ <i>I</i> ≥ 2 $\sigma$ ( <i>I</i> )] | R <sub>1</sub> = 0.0249,<br>wR <sub>2</sub> = 0.0560                           | R <sub>1</sub> = 0.0404,<br>wR <sub>2</sub> = 0.0881                            | R <sub>1</sub> = 0.0459,<br>wR <sub>2</sub> = 0.0993                            | R <sub>1</sub> = 0.0274,<br>wR <sub>2</sub> = 0.0502                             | R <sub>1</sub> = 0.0252,<br>wR <sub>2</sub> = 0.0521                | R <sub>1</sub> = 0.0195,<br>wR <sub>2</sub> = 0.0434                                        | R <sub>1</sub> = 0.0193,<br>wR <sub>2</sub> = 0.0449                           | R <sub>1</sub> = 0.0239,<br>wR <sub>2</sub> = 0.0463                                    |
| Final R indexes [all data]                            | R <sub>1</sub> = 0.0290,<br>wR <sub>2</sub> = 0.0579                           | R <sub>1</sub> = 0.0564,<br>wR <sub>2</sub> = 0.0959                            | R <sub>1</sub> = 0.0906,<br>wR <sub>2</sub> = 0.1202                            | R <sub>1</sub> = 0.0367,<br>wR <sub>2</sub> = 0.0530                             | R <sub>1</sub> = 0.0297,<br>wR <sub>2</sub> = 0.0539                | R <sub>1</sub> = 0.0217,<br>wR <sub>2</sub> = 0.0441                                        | R <sub>1</sub> = 0.0220,<br>wR <sub>2</sub> = 0.0460                           | R <sub>1</sub> = 0.0330,<br>wR <sub>2</sub> = 0.0492                                    |
| Largest diff. peak/hole / e Å <sup>-3</sup>           | 0.64/-0.66                                                                     | 2.02/-2.17                                                                      | 1.67/-1.12                                                                      | 0.87/-0.90                                                                       | 0.62/-0.42                                                          | 0.42/-0.46                                                                                  | 0.63/-0.36                                                                     | 0.42/-0.41                                                                              |

Current level: 0.312

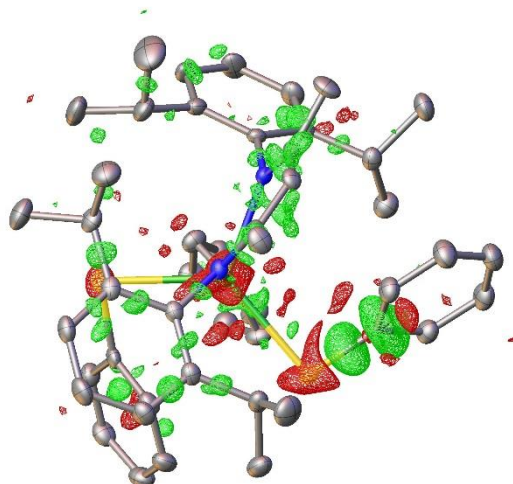

Current level: 0.312

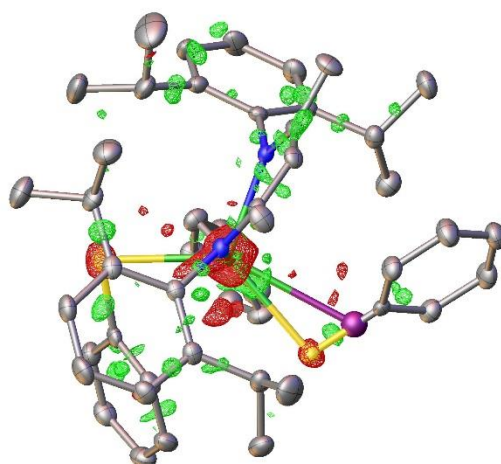

**Fig. S1.** Left – the residual electron density map ( $0.31 e\text{\AA}^{-3}$  level) for a model  $[\text{Dy}^{\text{(dippnacnac}^{\text{Me}})}(\text{SPh})_2(\text{thf})]$  ( $2^{\text{Dy}}$ ) with full occupancy in complex  $2^{\text{Dy}}$ . Right – the residual electron density map for a model with partially occupied I (2.6%) and one of SPh (97.4%). Green and red area show excess or lack of electron density, respectively. Hydrogen atoms are not shown.

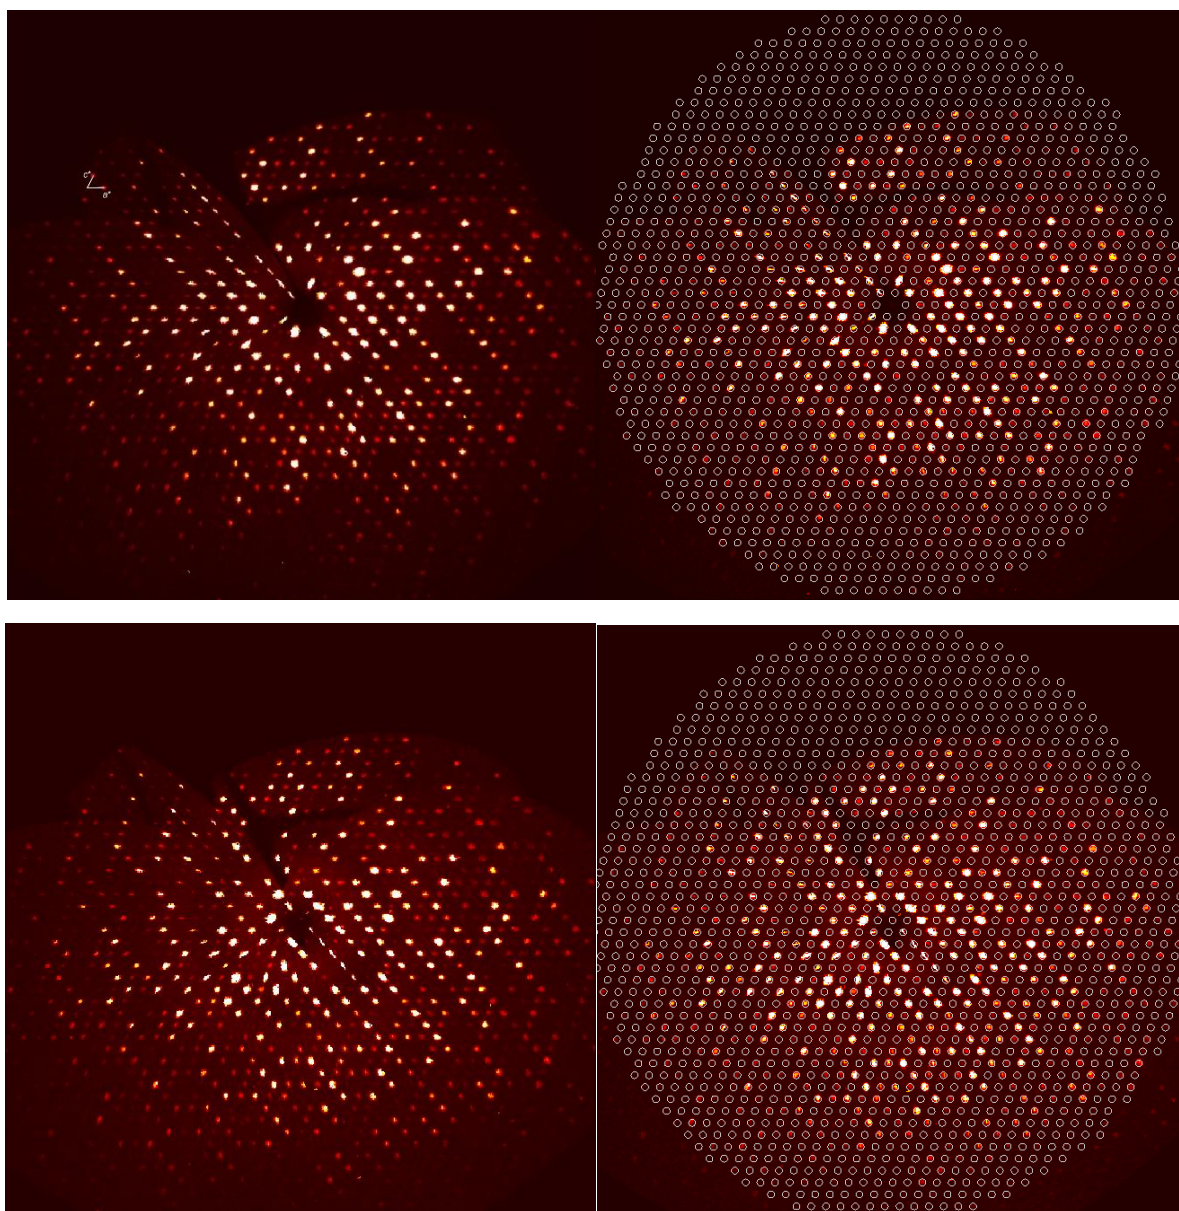

**Fig. S2.** Left – reciprocal space reconstructions for  $1^{\text{Tb}}$ , view of  $h0l$  (top) and  $h1l$  (bottom) layers (the thickness of the layers of  $0.10 \text{ \AA}$ ). Right – the corresponding reconstructions with calculated Bragg positions of reflections for the superstructure  $1^{\text{Tb}}(\text{super})$  (the cell volume of  $7866 \text{ \AA}^3$ ).

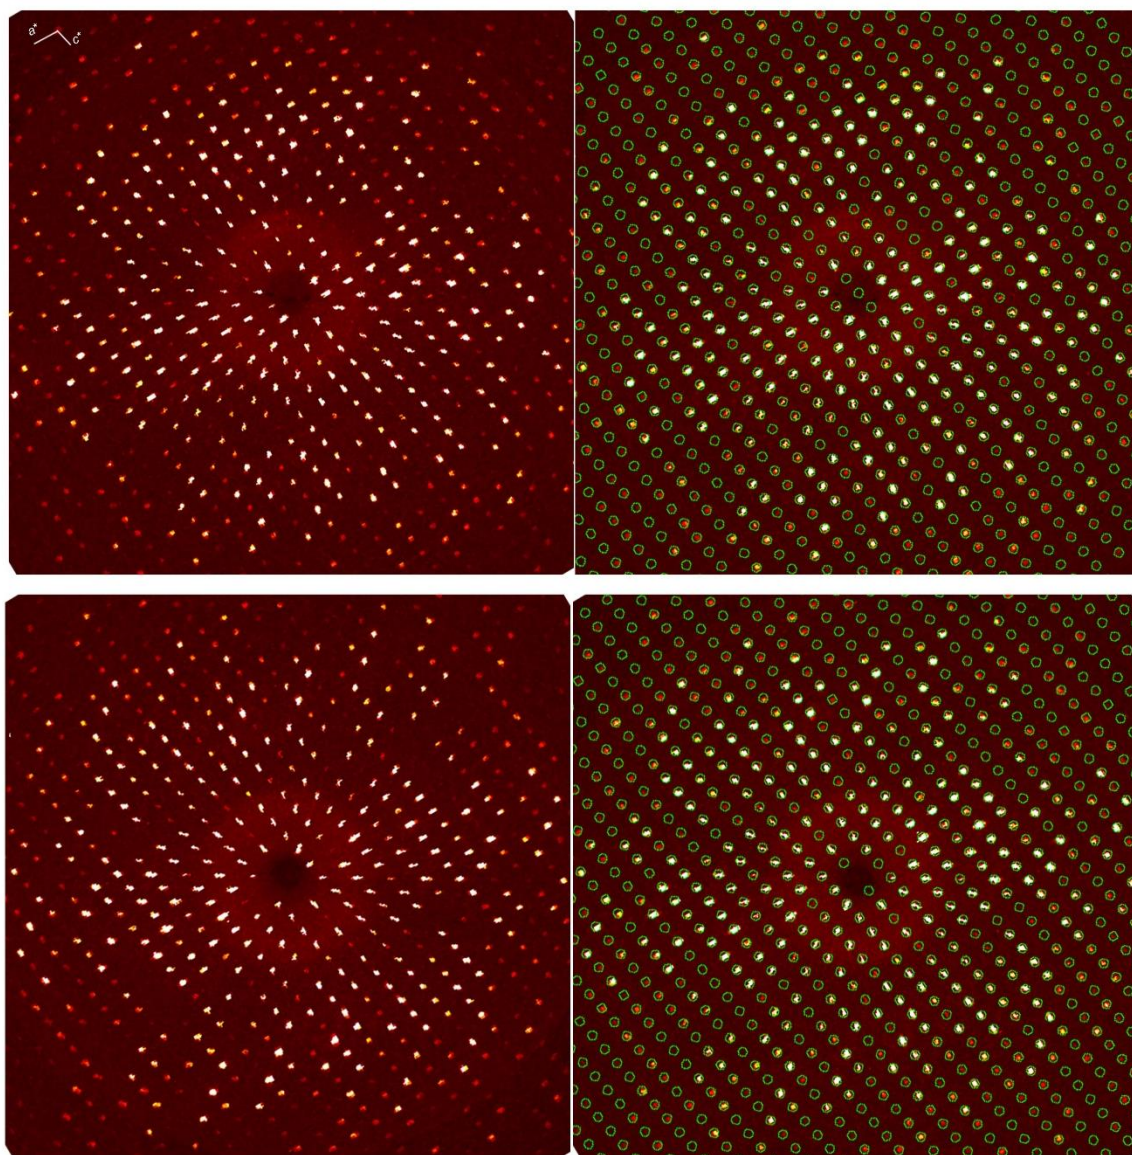

**Fig. S3.** Left – reciprocal space reconstructions for yet another single crystal of  $1^{\text{Tb}}$  that do not show superstructure reflections. View of  $h0l$  (top) and  $h1l$  (bottom) layers (the thickness of the layers of  $0.10 \text{ \AA}$ ). Right – the corresponding reconstructions with calculated Bragg positions of reflections for the substructure (the cell volume of  $3910 \text{ \AA}^3$ ).

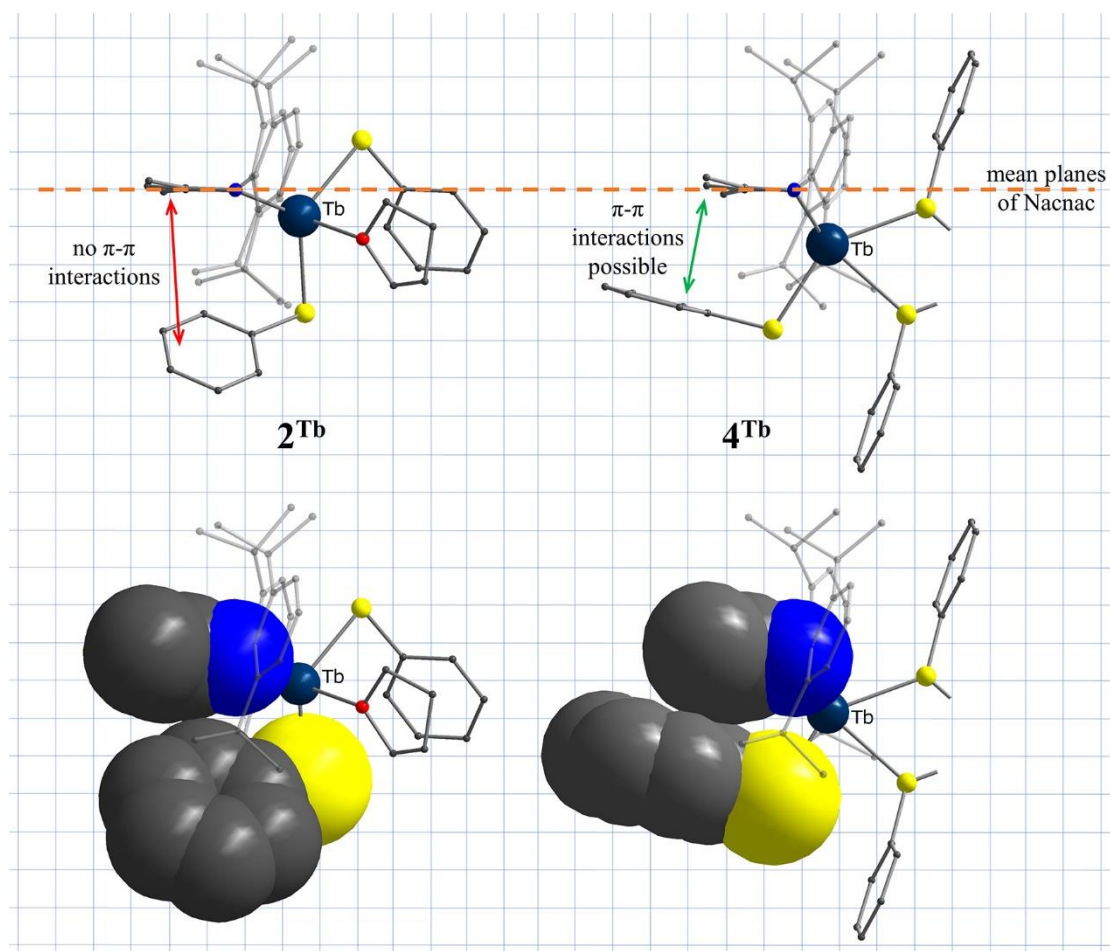

**Fig. S4.** Comparison of relative disposition of  $\text{Nacnac}^-$  and  $\text{SPh}^-$  ligands in the complexes  $2^{\text{Tb}}$  (*left*) and  $4^{\text{Tb}}$  (*right*). The complexes are arranged so that viewing direction goes through both N atoms of the  $\text{Nacnac}^-$  ligand and its mean plane (drawn through atoms  $\text{N}^1$ ,  $\text{N}^2$ ,  $\text{C}^1$ ,  $\text{C}^3$ ) is horizontal. Bottom row: the same disposition of the complexes with the closest  $\text{Nacnac}^-$  and  $\text{SPh}^-$  ligands shown in van der Waals spheres. Dipole moieties are simplified, the second half of the complex  $4^{\text{Tb}}$  is omitted. A grid with 1 Å spacing is shown in background.

## 2. Electronic absorption spectra

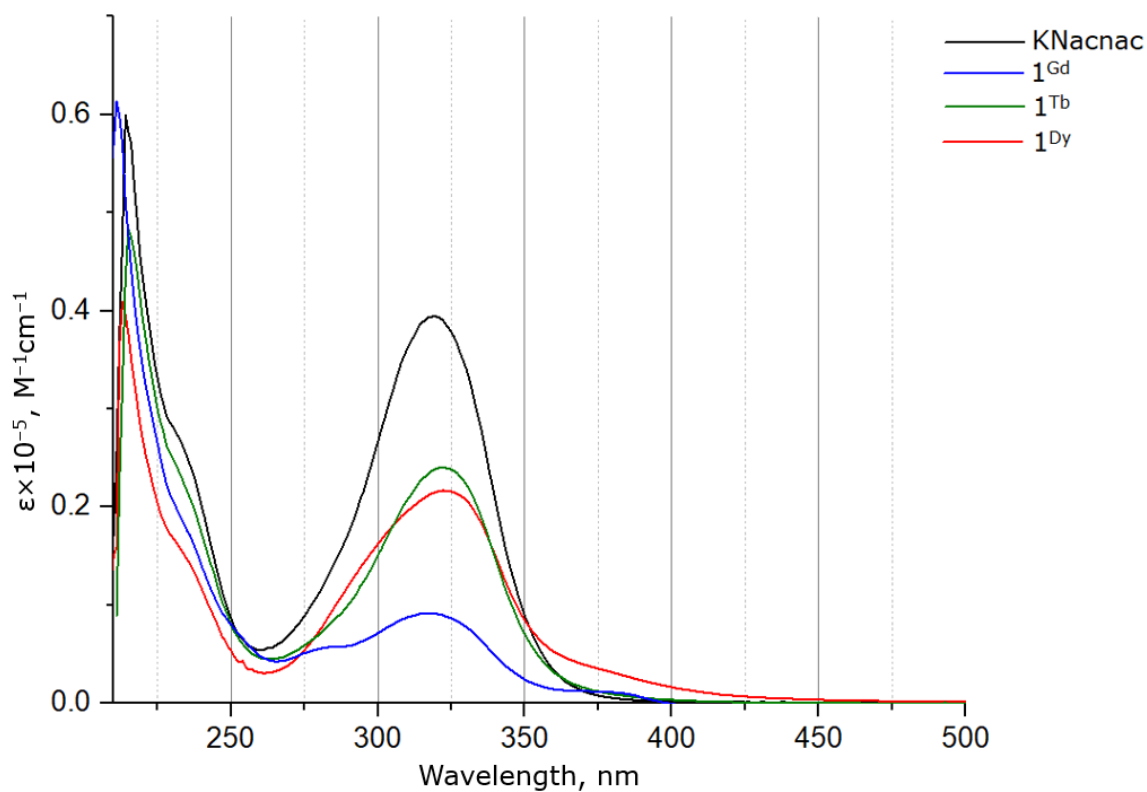

**Fig. S5.** Electronic absorption spectra of **1<sup>Ln</sup>** and KNacnac in THF.

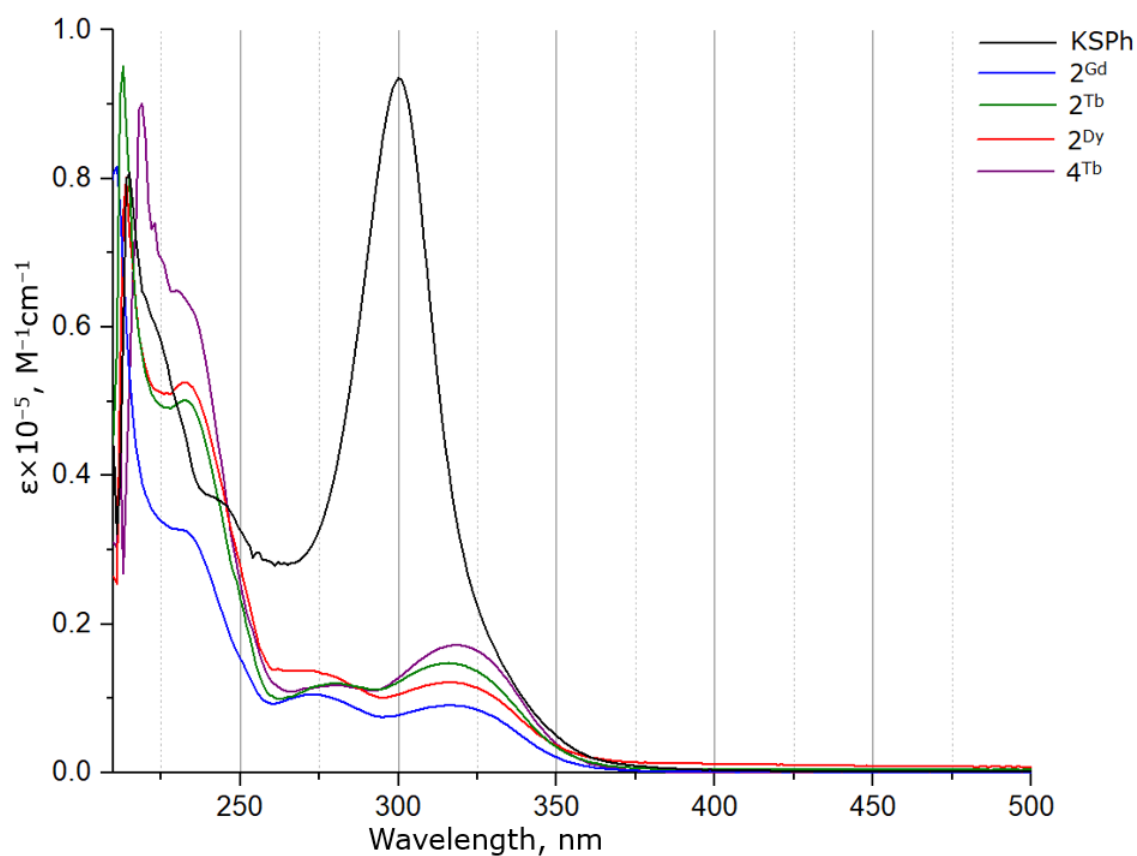

**Fig. S6.** Electronic absorption spectra of **2<sup>Ln</sup>** and KSPH in THF, **4<sup>Tb</sup>** in CH<sub>2</sub>Cl<sub>2</sub>. Molar extinction coefficient was not determined for KSPH due to its low solubility.

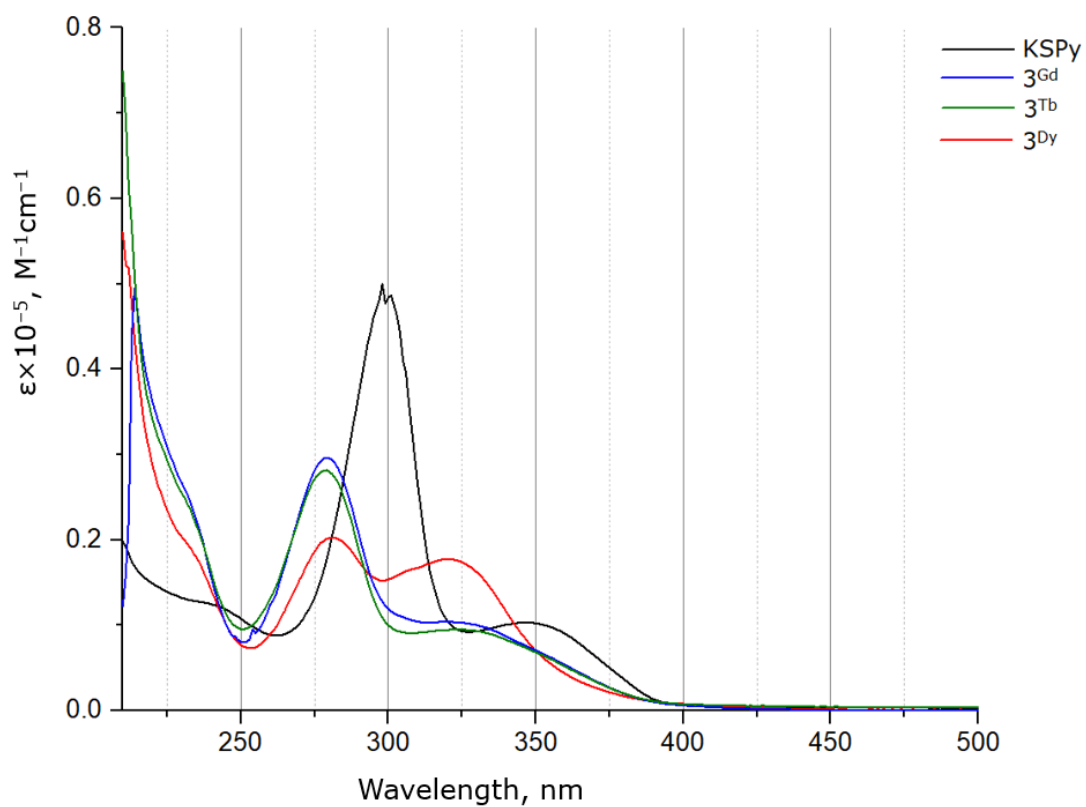

**Fig. S7.** Electronic absorption spectra of  $3^{\text{Ln}}$  and KSPy in THF. Molar extinction coefficient was not determined for KSPy due to its low solubility.



### 3. Luminescent study

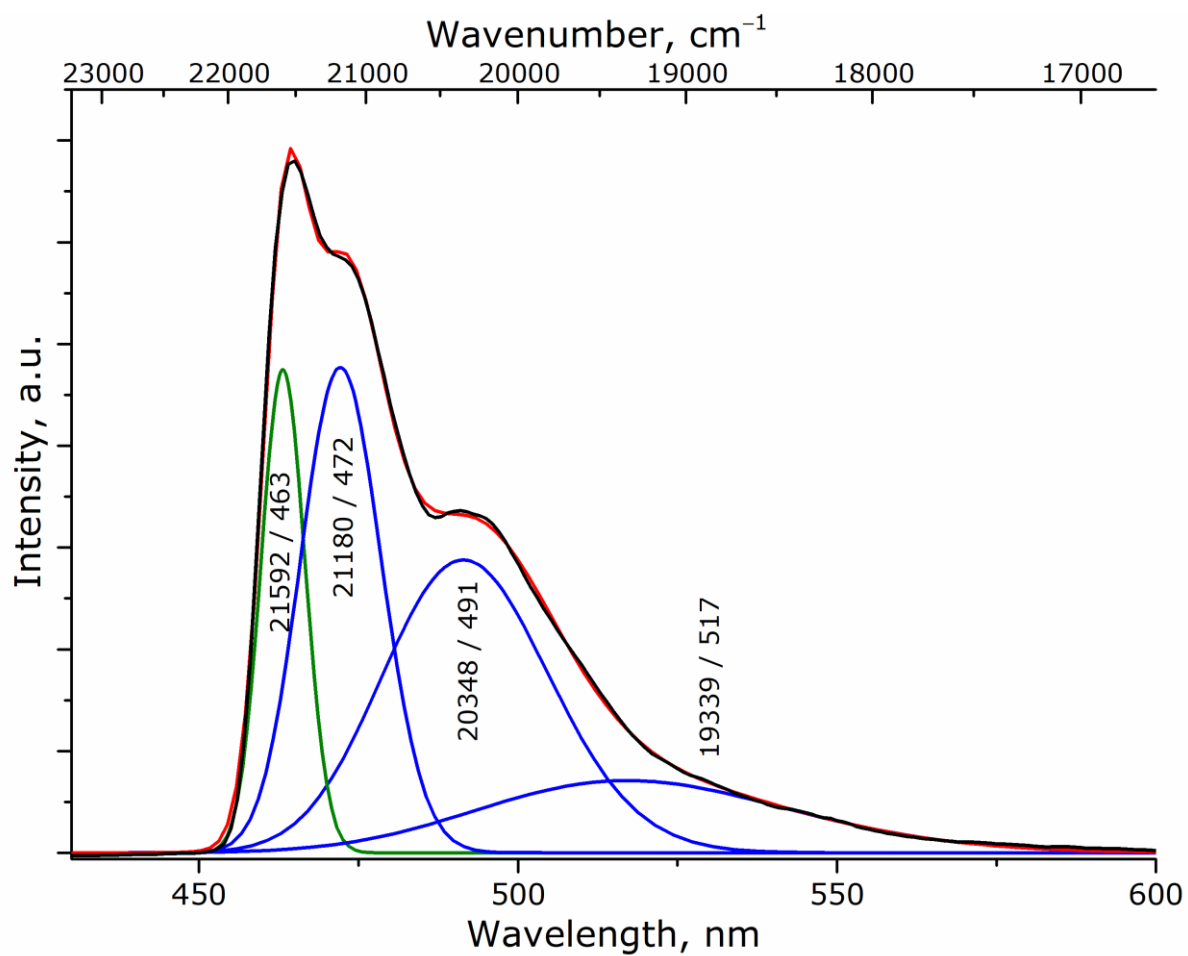

**Fig. S8.** Approximation of  $3\text{Gd}$  PL spectrum obtained at 77 K by Gaussian curves (green and blue for separate peaks, red for the sum). The fitting is performed in the energy scale; fitted peak values are given as wavenumber,  $\text{cm}^{-1}$  / wavelength, nm

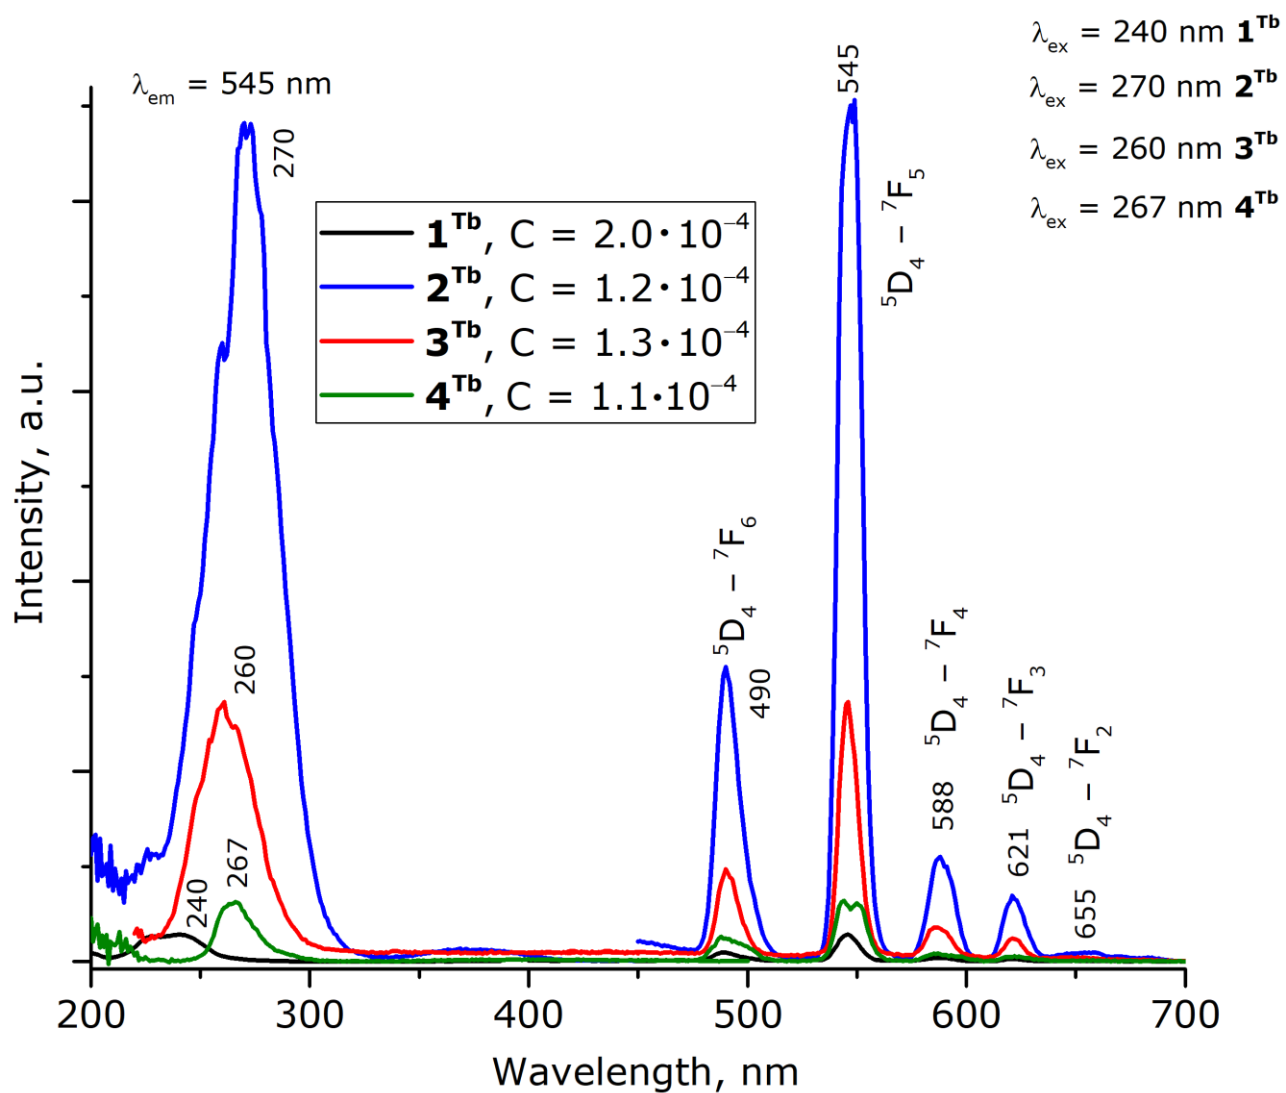

**Fig. S9.** Emission and excitation spectra of  $\mathbf{1}^{Tb}$ – $\mathbf{3}^{Tb}$  in thf solutions and  $\mathbf{4}^{Tb}$  in  $\text{CH}_2\text{Cl}_2$  solution. For all spectra 5 nm slit widths were used

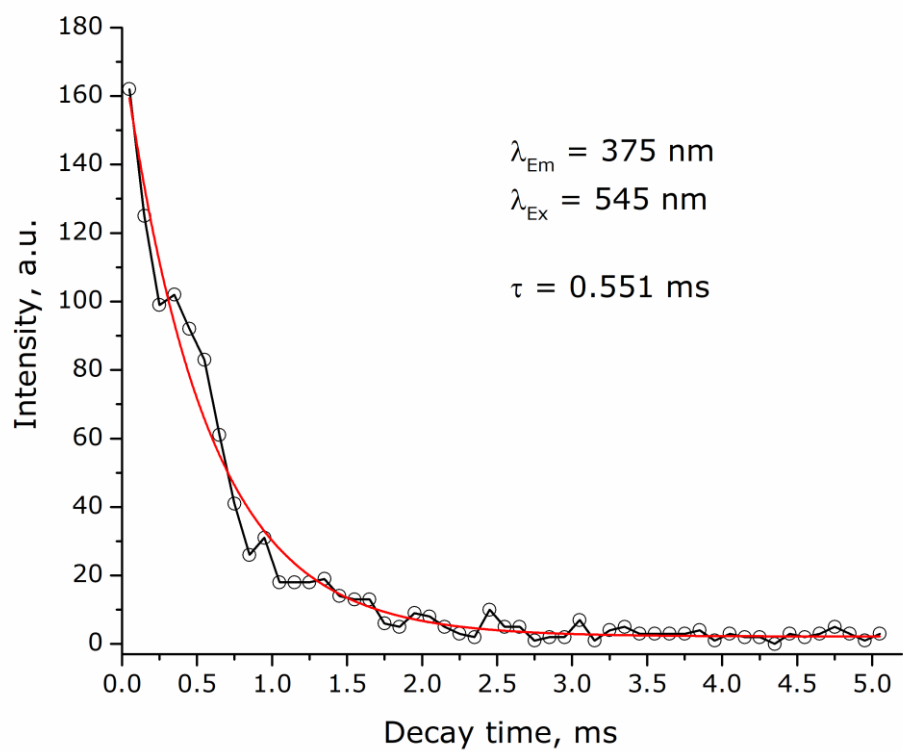

**Fig. S10.** Emission decay of solid-state luminescence of  $1^{Tb}$  at 298 K

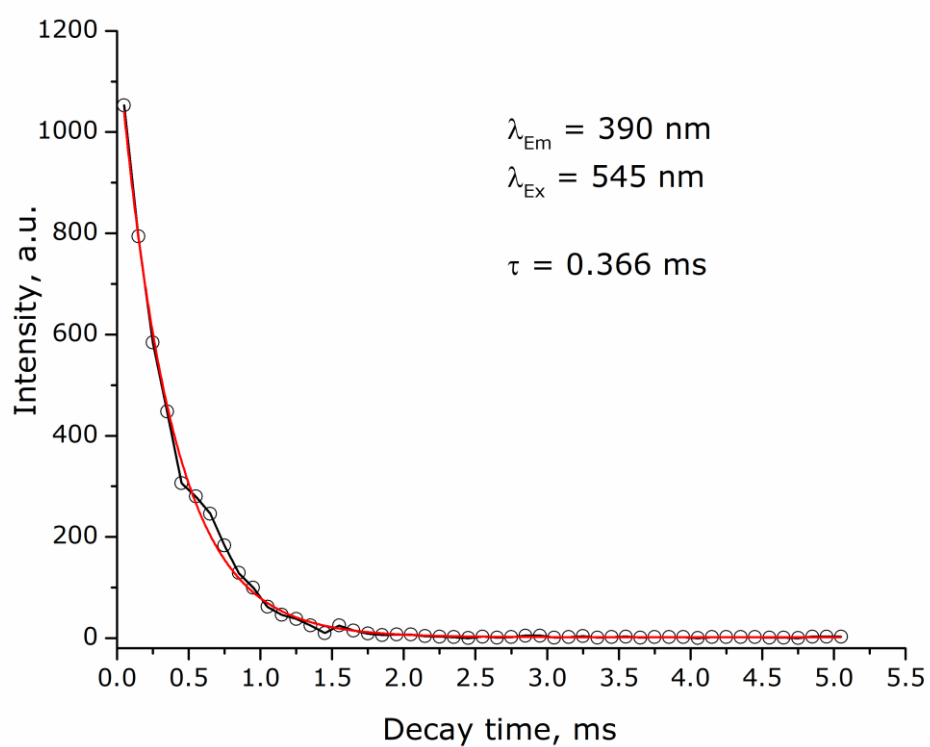

**Fig. S11.** Emission decay of solid-state luminescence of  $2^{Tb}$  at 298 K

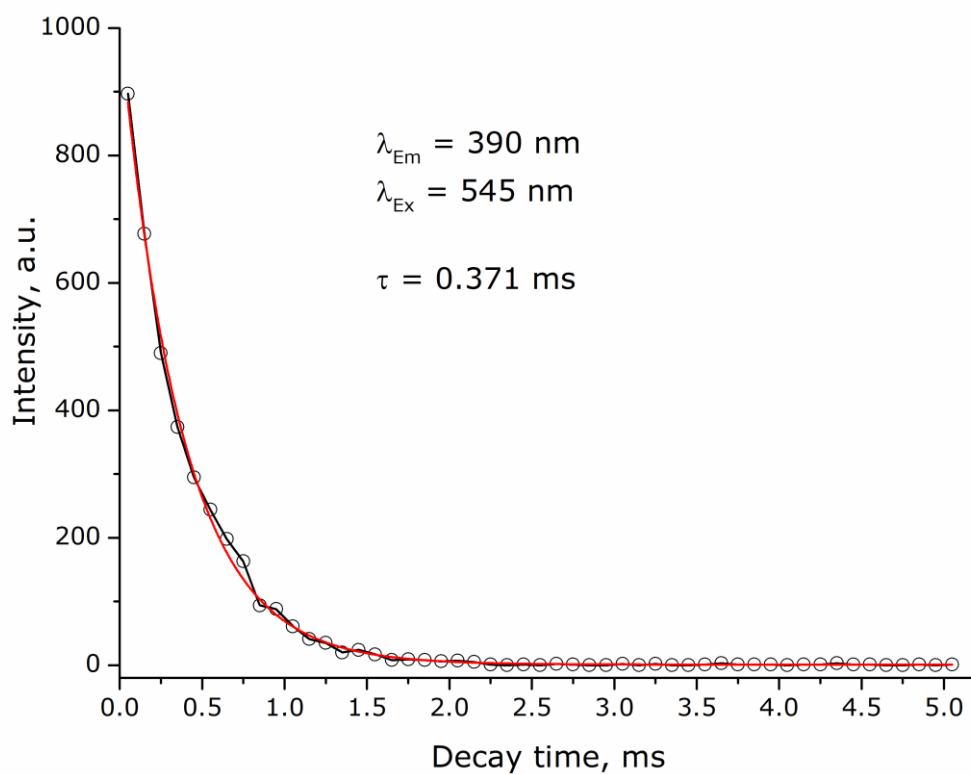

**Fig. S12.** Emission decay of solid-state luminescence of  $3^{Tb}$  at 298 K

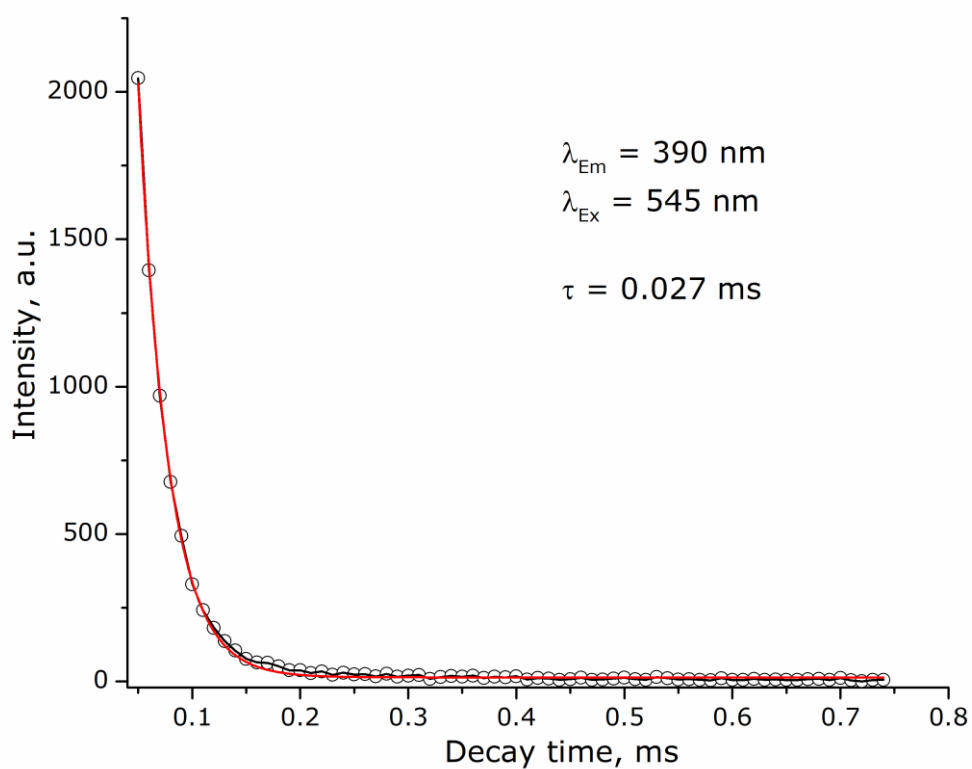

**Fig. S13.** Emission decay of solid-state luminescence of  $4^{Tb}$  at 298 K

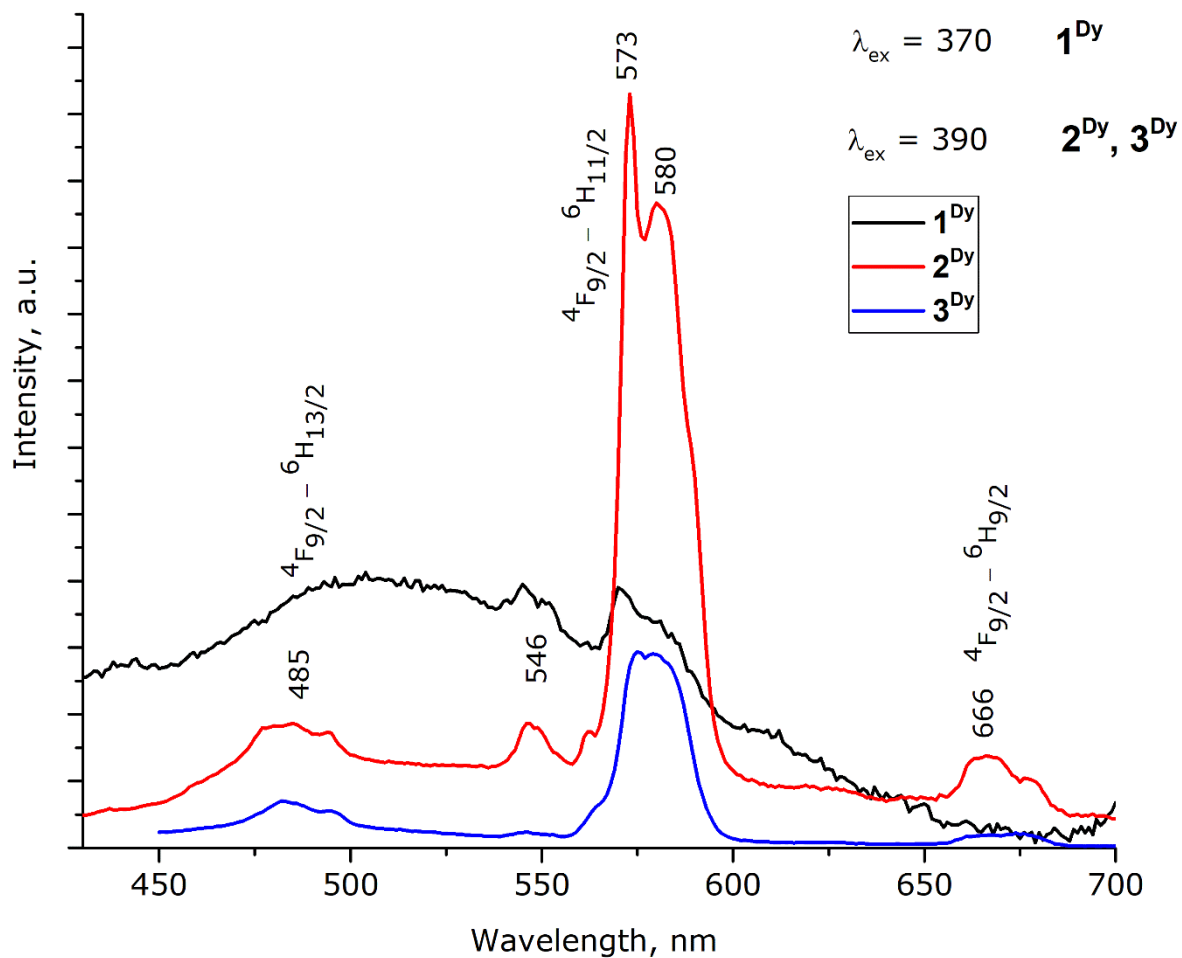

**Figure S14.** Emission spectra of  $1^{\text{Dy}}$ ,  $2^{\text{Dy}}$ , and  $3^{\text{Dy}}$  solids (crystalline samples, room temperature, slit widths 3 , 3 and 5 nm, respectively)

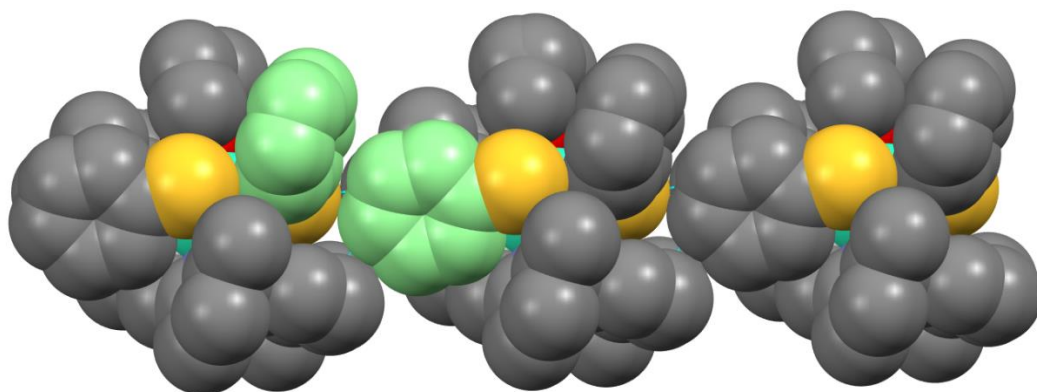

**Figure S15.** Packing of molecules of  $2^{\text{Tb}}$  along the [100] direction in the crystal; three neighboring molecules are shown. A pair of the closest Ph cycles of the neighboring molecules are shown in green (edge-to-face type contact)

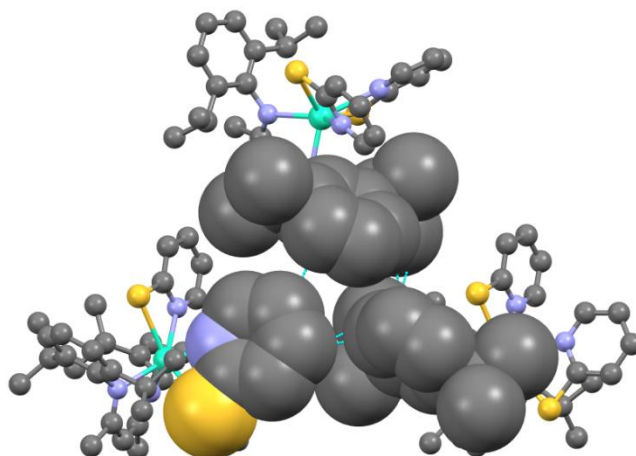

**Figure S16.** A group of three contacting molecules in the crystal of  $3^{\text{Dy}} \cdot 0.5\text{thf}$  (isostructural with the Tb complex). Only the closest SPy and Dipp moieties are shown in vdW spheres. The Py cycle has the closest contact with the top Dipp unit (shortest  $\text{C} \cdots \text{C}$  distance of 3.7 Å)

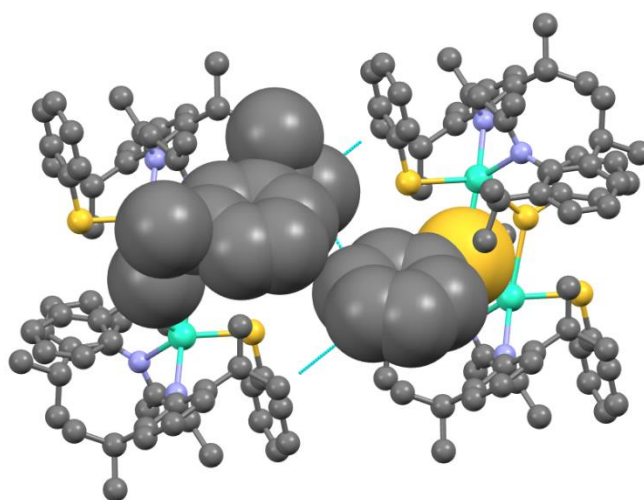

**Figure S17.** Packing interactions between  $\mu\text{-SPh}$  and Dipp moieties of neighboring binuclear molecules in the structure of  $4^{\text{Tb}} \cdot 2\text{toluene}$  (shortest  $\text{C} \cdots \text{C}$  distance of 3.4 Å). One of two symmetrical contacting pairs is shown in vdW spheres.
